# Supplementary material
Source: PubMed Central journal article supplement (PMC5605411)

Supplemental Figure 1

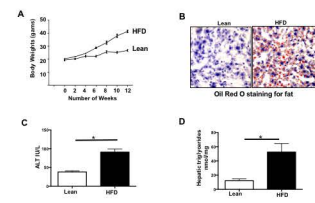



Supplemental Figure 2

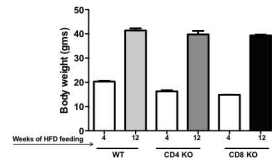

Supplemental Figure 3

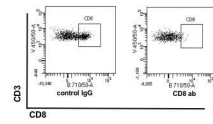

Supplemental Figure 4

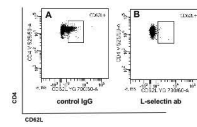

Supplement: NIHMS877676-supplement-Supp_info.pdf [file NIHMS877676-supplement-Supp_info.pdf]
